# Supplementary material
Source: PubMed Central journal article supplement (PMC2574819)

## SUPPLEMENTARY INFORMATION FOR

### Superior Removal of Hydantoin Lesions Relative to other Oxidized Bases by the human DNA glycosylase hNEIL1 <sup>¶</sup>

Nirmala Krishnamurthy<sup>1§</sup>, Xiaobei Zhao<sup>1§</sup>, Cynthia J. Burrows<sup>1</sup> and Sheila S. David<sup>2</sup>

Supplementary Figure 1

Figure Legend: HPLC trace of separation of Sp diastereomers. The two diastereomers of Sp are separated on a Dionex DNAPac PA-100 column as described in the methods section.

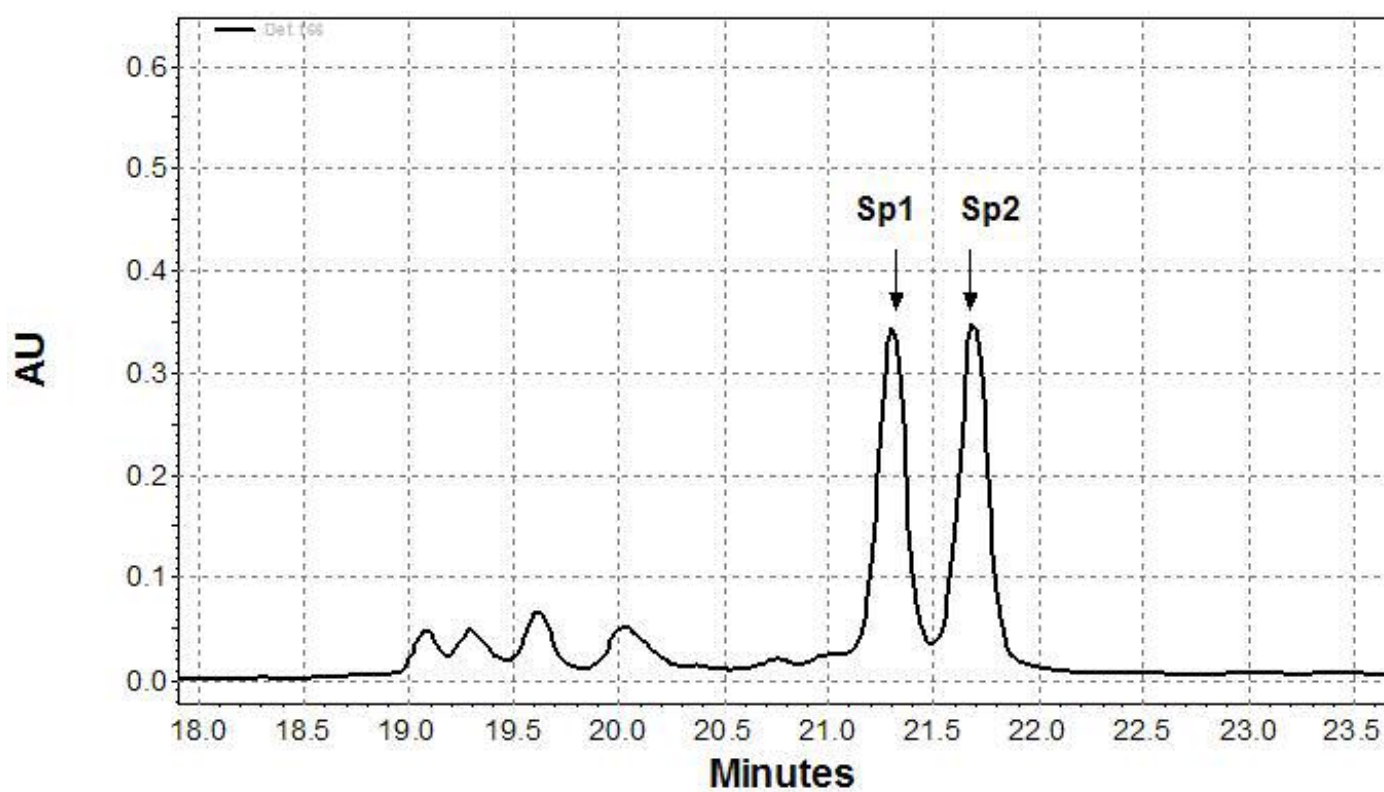

Supplement: NIHMS56165-supplement-1.pdf [file NIHMS56165-supplement-1.pdf]
